# Supplementary material for: The Indonesian Throughflow circulation under solar geoengineering
Source: Copernicus journal article supplement (doi:10.5194/esd-14-1317-2023), 2023-12-20
Supplement: Supplementary file 1 [file esd-14-1317-2023-supplement.pdf]

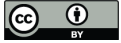

*Supplement of*

## **The Indonesian Throughflow circulation under solar geoengineering**

**Chencheng Shen et al.**

*Correspondence to:* John C. Moore ([john.moore.bnu@gmail.com](mailto:john.moore.bnu@gmail.com)) and Liyun Zhao ([zhaoliyun@bnu.edu.cn](mailto:zhaoliyun@bnu.edu.cn))

The copyright of individual parts of the supplement might differ from the article licence.

1 **Supplementary Information**

2

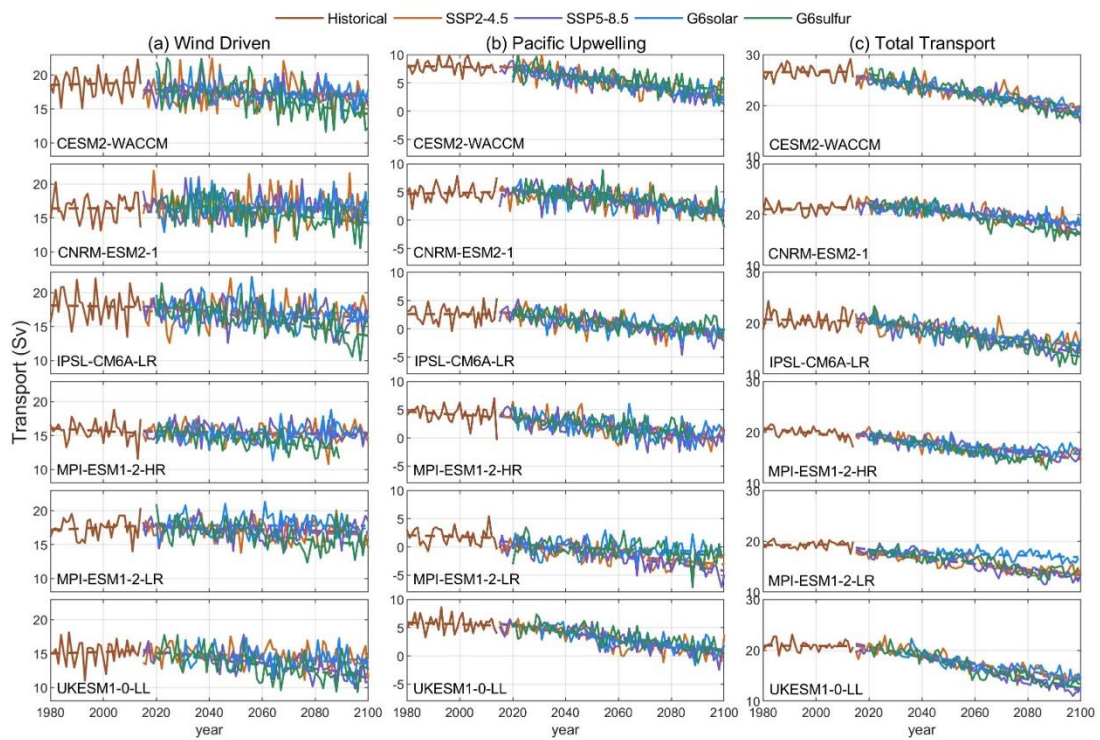

3

4 **Figure S1.** (a) the time series of ITF transport in the six ESMs for wind driven component under  
5 different scenarios. (b) as Figure S1a for Pacific upwelling contribution. (c) as Figure S1a for total ITF  
6 transport under Amended Island Rule.

7

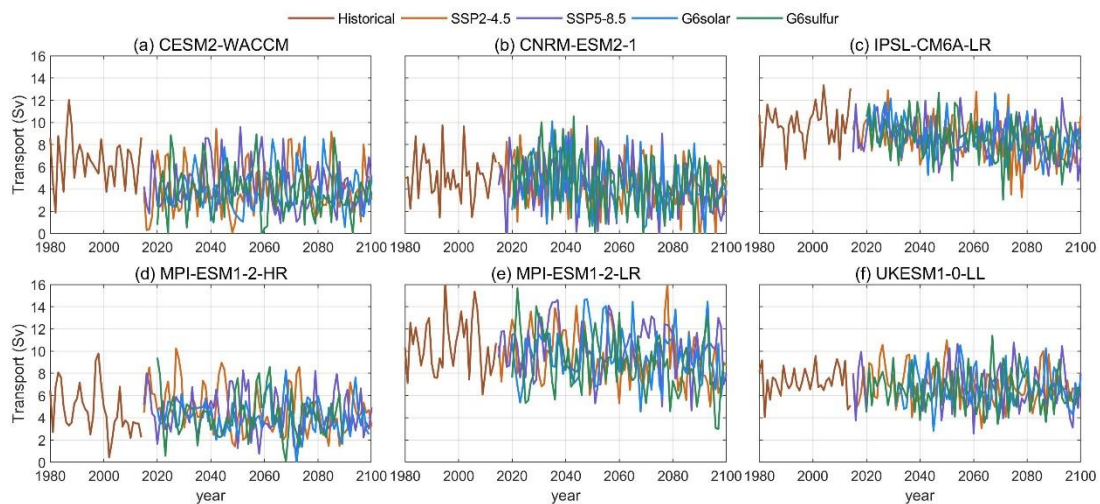

8

9 **Figure S2.** The ITF transport in the six ESMs by buoyancy forcing during 1980-2100

10

1

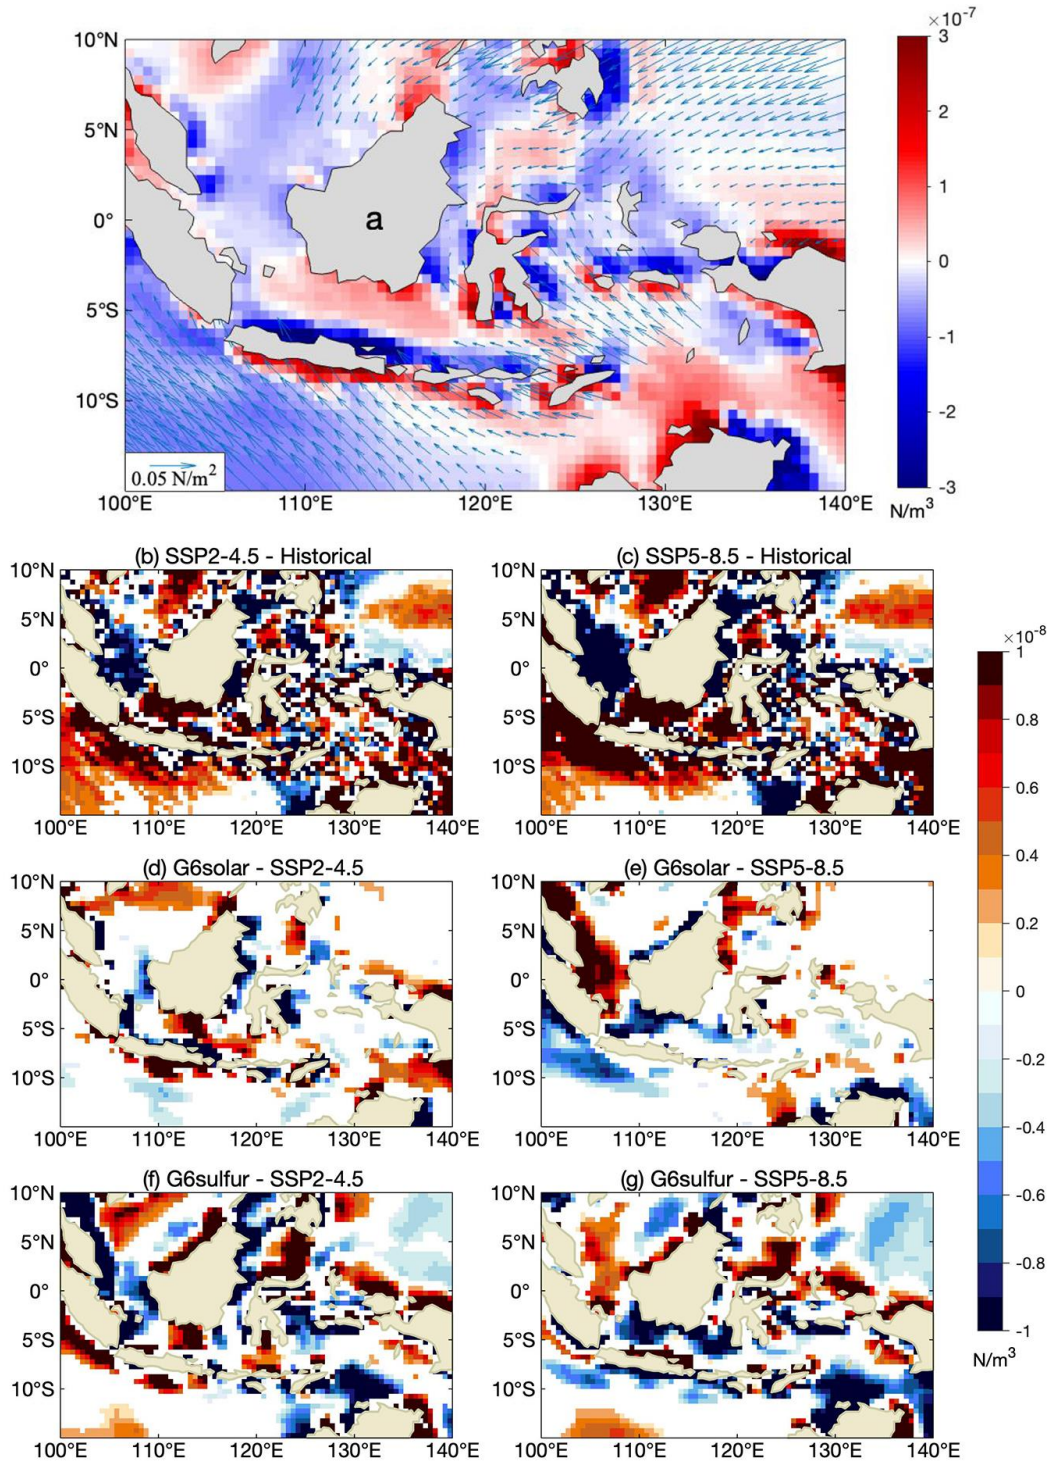

11  
 12 **Figure S3.** the ITF inlet region around the Indonesian archipelago in more detail than shown in Fig. 4.  
 13 The multi-model mean differences in wind stress curl (a) the historical mean and the arrows show the  
 14 wind stress, (b) SSP2-4.5 and historical, (c) SSP5-8.5 and historical, (d) G6solar and SSP2-4.5, (e)  
 15 G6solar and SSP5-8.5, (f) G6sulfur and SSP2-4.5, (g) G6sulfur and SSP5-8.5. The historical period is  
 16 1980-2014, and the future scenarios period is 2080-2100. Regions where differences are not significant  
 17 at the 95% level by the Wilcoxon signed-rank test are masked in white.

18

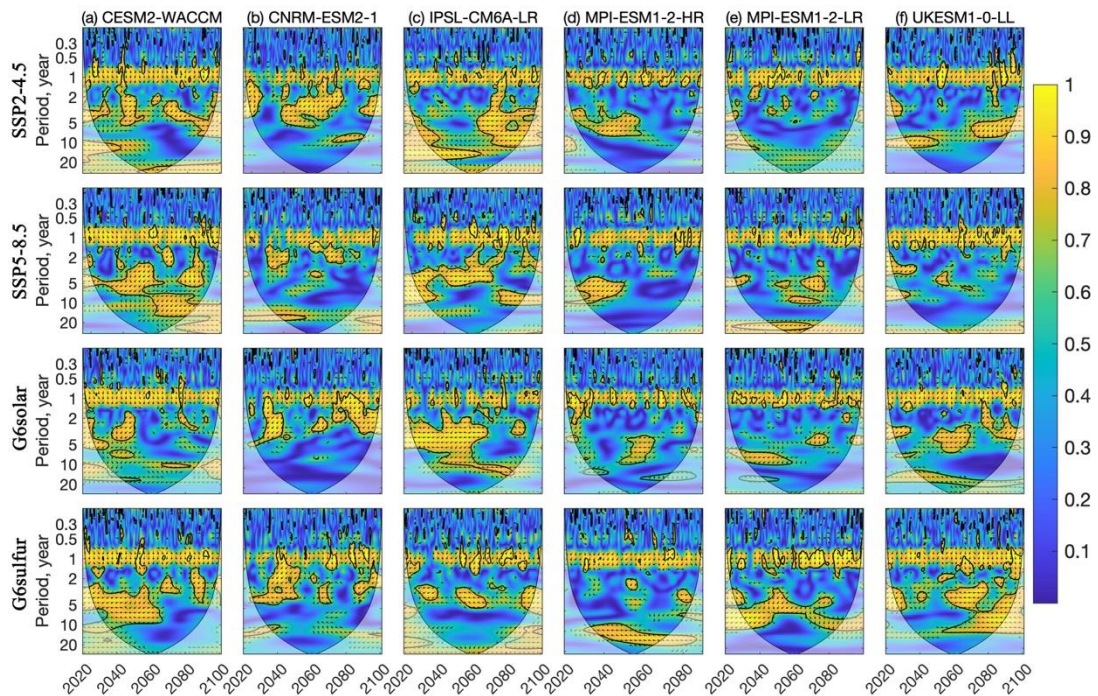

20

21 **Figure S4.** The squared wavelet coherence between the Nino3.4 (representing ENSO) and the wind-  
 22 driven ITF transport monthly anomalies under the two SSPs (2015-2100) and two G6 (2020-2100)  
 23 scenarios in six models. The 95% significance level above the background of 1000 Monte-Carlo  
 24 ensemble of series of identical mean and standard deviation with identical power spectra but phase-  
 25 randomized Fourier noise (chosen instead of the usual first order autoregressive null hypothesis here  
 26 because of the strong annual signal; Xia et al. (2023)), is represented by a thick contour line. The  
 27 arrows indicate the relative phase relationship, that is, in-phase points to the right, anti-phase points to  
 28 the left, the arrow up indicates that the ITF anomaly leads ENSO by 90°, and a down arrow indicates  
 29 that the ITF anomaly lags ENSO by 90°.

30

31

32 **Table S1**

33 The differences in monthly ITF Transport (2020-2100)<sup>a</sup> and its components for six models; wind is the  
 34 ITF transport derived from Island Rule; Upwelling is the area integral of Pacific upwelling rate at  
 35 1500m; Total is the ITF transport calculating by Amended Island Rule; Buoyancy is the ITF transport  
 36 by buoyancy forcing. Unit: Sv (1Sv = 10<sup>6</sup> m<sup>3</sup>/s)

| Differences            |           | CESM2-<br>WACCM | CNRM-<br>ESM2-1 | IPSL-<br>CM6A-LR | MPI-<br>ESM1-2-<br>HR | MPI-<br>ESM1-2-<br>LR | UKESM1-<br>0-LL |
|------------------------|-----------|-----------------|-----------------|------------------|-----------------------|-----------------------|-----------------|
| G6solar –<br>SSP2-4.5  | Wind      | 0.01            | -0.11           | -0.07            | -0.16                 | <b>0.76</b>           | -0.33           |
|                        | Upwelling | -0.04           | 0.23            | 0.03             | 0.25                  | <b>1.17</b>           | 0.32            |
|                        | Total     | -0.03           | 0.12            | -0.04            | 0.09                  | <b>1.93</b>           | -0.02           |
|                        | Buoyancy  | -0.27           | 0.08            | 0.35             | -0.6                  | 0.18                  | -0.14           |
| G6sulfur –<br>SSP2-4.5 | Wind      | <b>-0.8</b>     | <b>-0.92</b>    | <b>-1.05</b>     | <b>-0.95</b>          | <b>-0.65</b>          | <b>-1.34</b>    |
|                        | Upwelling | <b>0.5</b>      | 0.36            | 0.29             | 0.34                  | <b>0.99</b>           | <b>0.58</b>     |
|                        | Total     | -0.31           | <b>-0.56</b>    | <b>-0.76</b>     | <b>-0.61</b>          | <b>0.34</b>           | <b>-0.76</b>    |
|                        | Buoyancy  | -0.49           | 0.25            | 0.15             | -0.41                 | -0.55                 | -0.4            |
| G6solar –<br>SSP5-8.5  | Wind      | 0.11            | 0.02            | 0.25             | -0.21                 | <b>0.63</b>           | <b>0.64</b>     |
|                        | Upwelling | 0.15            | -0.01           | 0.22             | 0.44                  | <b>1.29</b>           | 0.25            |
|                        | Total     | 0.26            | 0.01            | <b>0.46</b>      | 0.22                  | <b>1.92</b>           | 0.89            |
|                        | Buoyancy  | -0.17           | 0.08            | 0.05             | -0.23                 | <b>-0.6</b>           | -0.06           |
| G6sulfur –<br>SSP5-8.5 | Wind      | <b>-0.7</b>     | <b>-0.79</b>    | <b>-0.74</b>     | <b>-1.11</b>          | <b>-0.78</b>          | -0.37           |
|                        | Upwelling | <b>0.68</b>     | 0.12            | <b>0.48</b>      | 0.55                  | <b>1.12</b>           | <b>0.51</b>     |
|                        | Total     | -0.02           | <b>-0.67</b>    | -0.27            | <b>-0.57</b>          | <b>0.33</b>           | 0.14            |
|                        | Buoyancy  | -0.39           | 0.25            | -0.15            | -0.07                 | <b>-1.34</b>          | -0.33           |
| G6sulfur –<br>G6solar  | Wind      | <b>-0.81</b>    | <b>-0.81</b>    | <b>-0.99</b>     | <b>-0.82</b>          | <b>-1.41</b>          | <b>-1.01</b>    |
|                        | Upwelling | <b>0.53</b>     | 0.13            | 0.26             | 0.23                  | -0.18                 | 0.26            |
|                        | Total     | -0.28           | <b>-0.68</b>    | <b>-0.72</b>     | <b>-0.59</b>          | <b>-1.59</b>          | <b>-0.75</b>    |
|                        | Buoyancy  | 0.22            | 0.17            | -0.21            | 0.20                  | <b>-0.74</b>          | -0.27           |

37 <sup>a</sup>The end dates of the G6solar and G6sulfur of MPI-ESM1-2-HR are 2099 and 2089, respectively, and  
 38 those of MPI-ESM1-2-LR are both in 2099. Values in bold are significant at the 95% level according  
 39 to the Wilcoxon signed-rank test.

40
